# Supplementary material
Source: Springer Nature journal article supplement (https://www.springermedizin.de/resource/supplementary/13054_2014_2597_MOESM8_ESM.docx/9714410)
Supplement: MOESM8 [file 9714410]

**Figure**

**Figure1. Area under the curves for RIFLE, AKIN and KDIGO classification schemes**


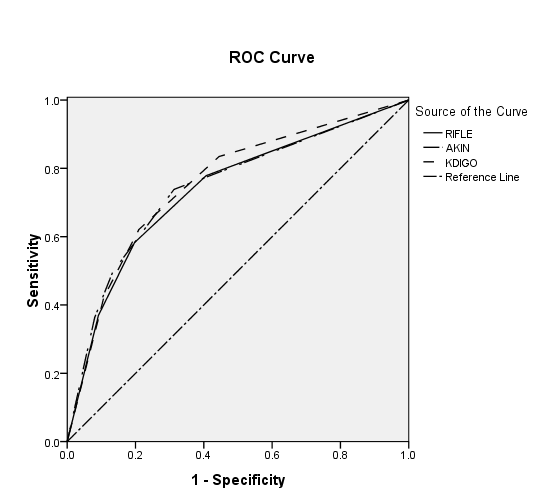


**RIFLE: Area Under the Curve 0.738 (95%CI 0.713-0.762, P < 0.001)**

**AKIN: Area Under the Curve 0.746 (95%CI 0.721-0.770, P < 0.001）**

**KDIGO: Area Under the Curve 0.757 (95%CI 0.733-0.780, P < 0.001）**
